# Supplementary material
Source: PubMed Central journal article supplement (PMC4120237)
Supplement: NIHMS606285-supplement-Supplemental_data.pdf [file NIHMS606285-supplement-Supplemental_data.pdf]

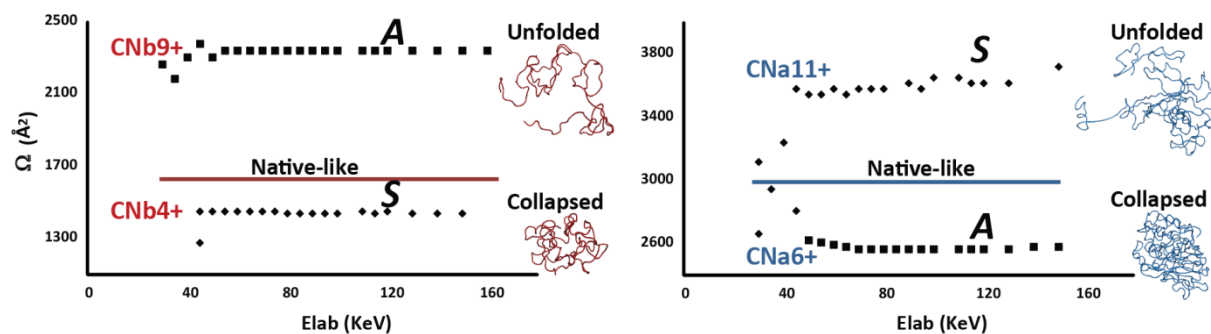

**Supplementary Figure 1.** Experimental  $\Omega$ 's of complementary CNa and CNb product ions formed from the CNT<sup>15+</sup> precursor ion as a function of acceleration voltage. A) The symmetric charge partitioning pathway resulting in the complementary pair of ions: CNa<sup>11+</sup> and CNb<sup>4+</sup>, exhibiting alike  $m/z$  values B) The asymmetric charge partitioning pathway resulting in the complementary pair of ions: CNa<sup>6+</sup> and CNb<sup>9+</sup>, whereby CNa holds a more native and even somewhat collapsed conformation and CNb is completely unfolded.
